# Supplementary material
Source: PubMed Central journal article supplement (PMC3874067)
Supplement: NIHMS513184-supplement-1_si_001.pdf [file NIHMS513184-supplement-1_si_001.pdf]

*Supporting Information for:*

**Enhanced Cell Death Imaging Using Multivalent Zinc(II)-Bis(dipicolylamine)  
Fluorescent Probes**

Bryan A. Smith, Shuzhang Xiao, Kara M. Harmatys, Erin L. Cole, Adam J. Plaunt, William  
Wolter, Mark A. Suckow, and Bradley D. Smith\*

Table of Contents

|                                                                |     |
|----------------------------------------------------------------|-----|
| 1. Vesicle Titration Data                                      | S2  |
| 2. Fluorescence Microscopy of Cell Death                       | S3  |
| 3. Spontaneous Prostate Tumor Imaging                          | S7  |
| 4. Longitudinal In Vivo Imaging of Traumatic Brain Injury      | S8  |
| 5. Quantification of In Vivo Imaging of Traumatic Brain Injury | S9  |
| 6. Cold Block Study in Traumatic Brain Injury Model            | S10 |

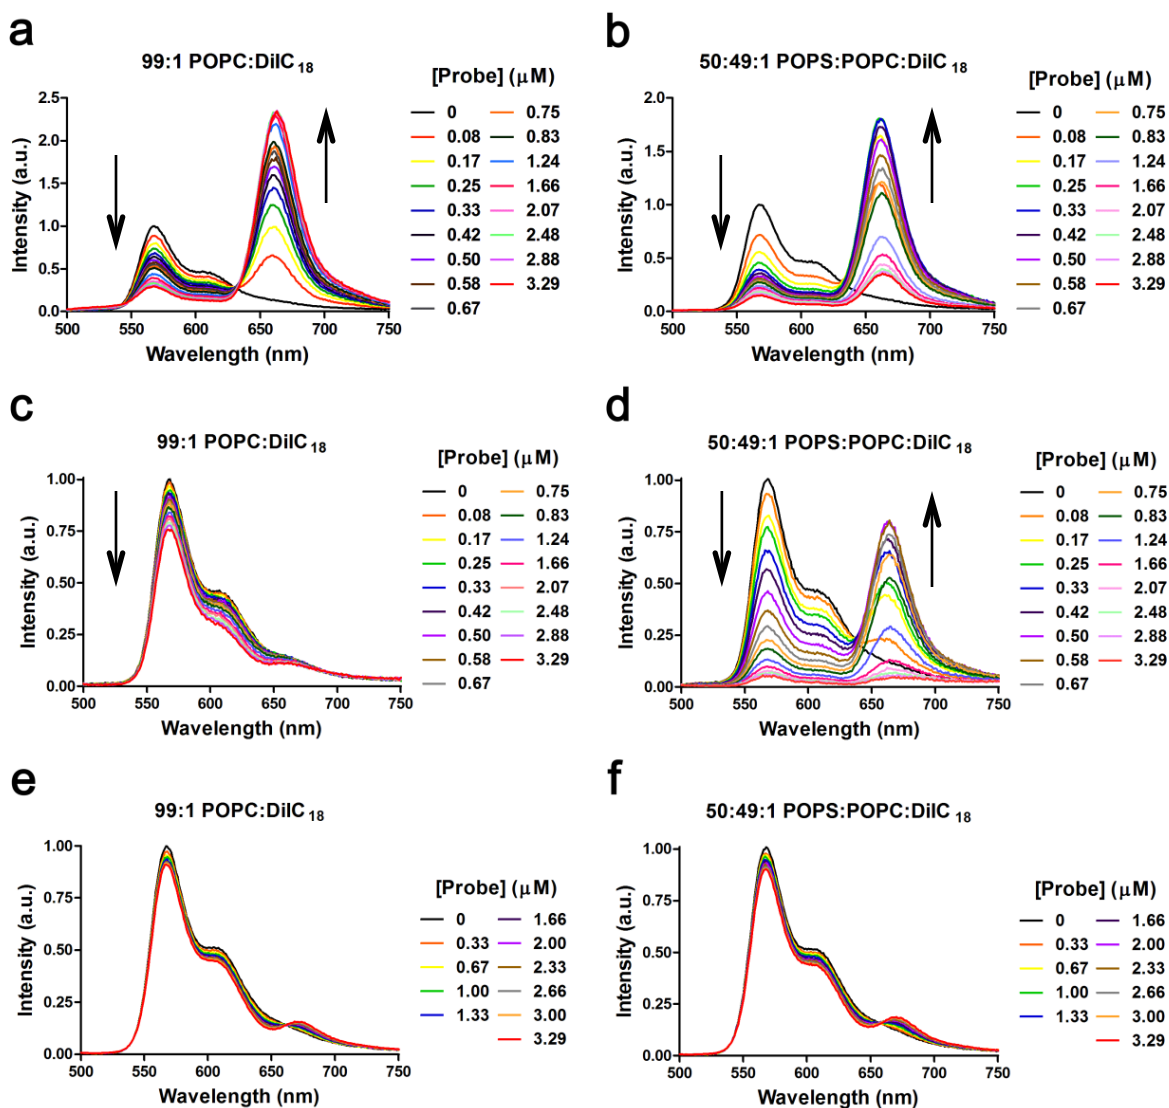

**Figure S1.** Normalized fluorescence spectra (ex: 480 nm) showing FRET induced by incremental addition of squaraine rotaxane probe (em: 670 nm) as energy acceptor to vesicles containing 1 mol % of the energy donor DiIC<sub>18</sub> (em: 570 nm) and either 99 % POPC, or 49:50 % POPC:POPS mixture (10  $\mu$ M total phospholipid) in HEPES buffer, pH 7.4. (a, b) Bis-Zn<sub>2</sub>BDPA-SR, (c, d) Tetra-Zn<sub>2</sub>BDPA-SR, (e, f) Tracer-653. The change in DiIC<sub>18</sub> emission intensity at 570 nm is plotted in article Figure 2. Note for the experiment in panel (d); vesicle precipitation occurred once the Tetra-Zn<sub>2</sub>BDPA-SR concentration was higher than 0.5  $\mu$ M as reflected by the incremental decrease of its emission intensity at 670 nm.

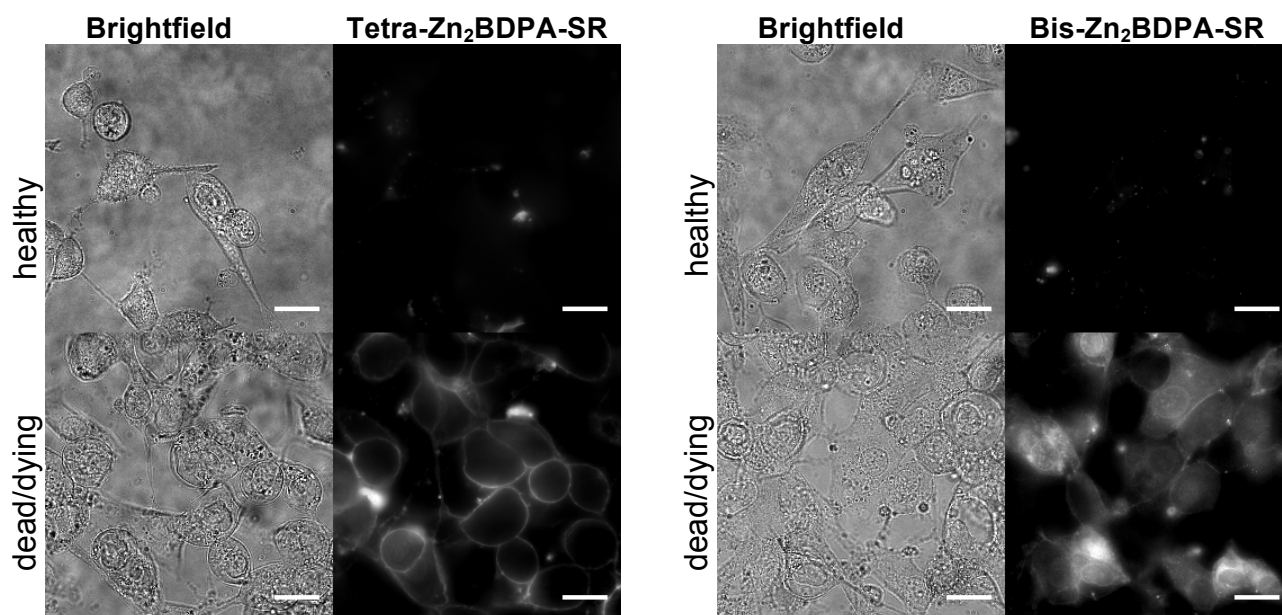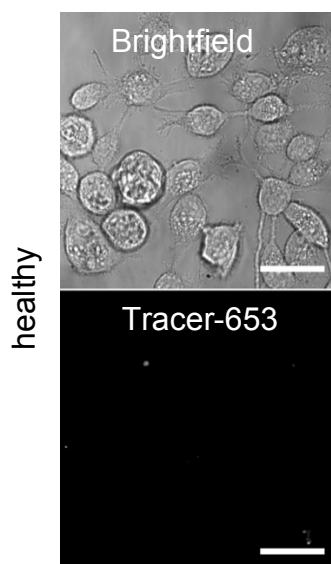

**Figure S2.** Brightfield and deep-red fluorescence micrographs of healthy MDA-MB-231 cells or dead/dying cells due to treatment with etoposide (15  $\mu$ M) for 11 h. The cells were imaged after incubation with 10  $\mu$ M of probe (Tetra-Zn<sub>2</sub>BDPA-SR, Bis-Zn<sub>2</sub>BDPA-SR, or Tracer-653) for 30 min at 37 °C, followed by washing with HEPES buffer. Scale bar = 30  $\mu$ m. These images expand the data presented in article Figure 3.

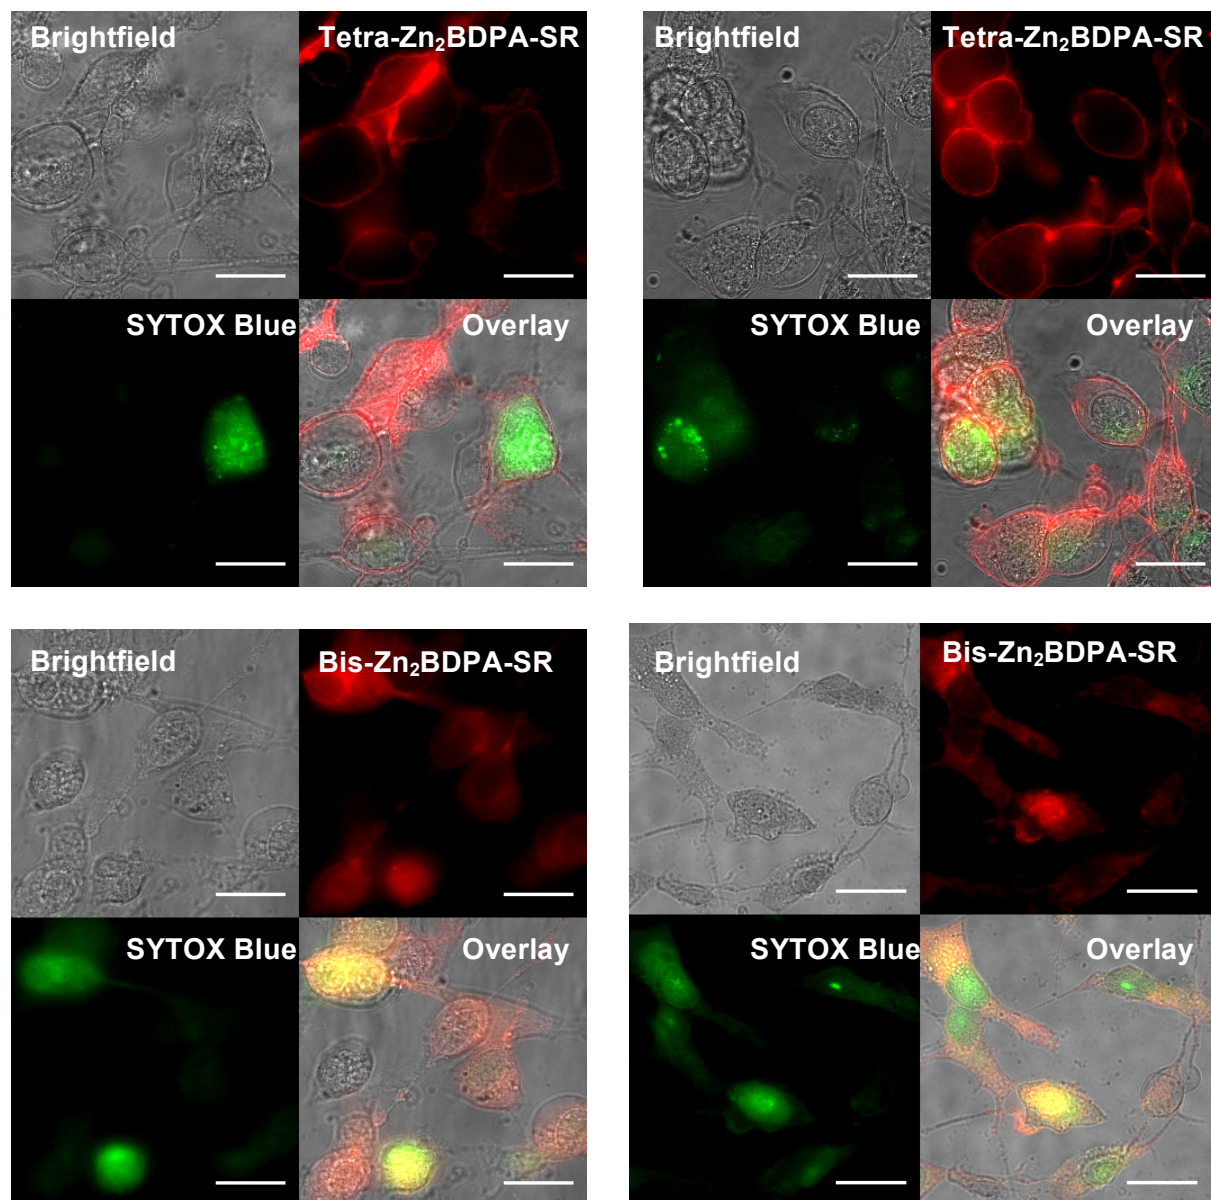

**Figure S3** Expansion of the data in article Figure 4. The four panels of brightfield and fluorescence micrographs show dead/dying MDA-MB-231 cells after incubation with nucleic acid stain SYTOX Blue (5  $\mu$ M) and either Tetra-Zn<sub>2</sub>BDPA-SR or Bis-Zn<sub>2</sub>BDPA-SR (10  $\mu$ M). In each case, the cells were initially treated with etoposide (15  $\mu$ M) for 11 hr, incubated with the probes for 30 min at 37 °C, then washed with HEPES buffer. Scale bar = 30  $\mu$ m. Unstained cells are designated healthy, cells stained red are apoptotic, and cells stained red and green are necrotic.

### Tetra-Zn<sub>2</sub>BDPA-SR staining of Dead/Dying Cells

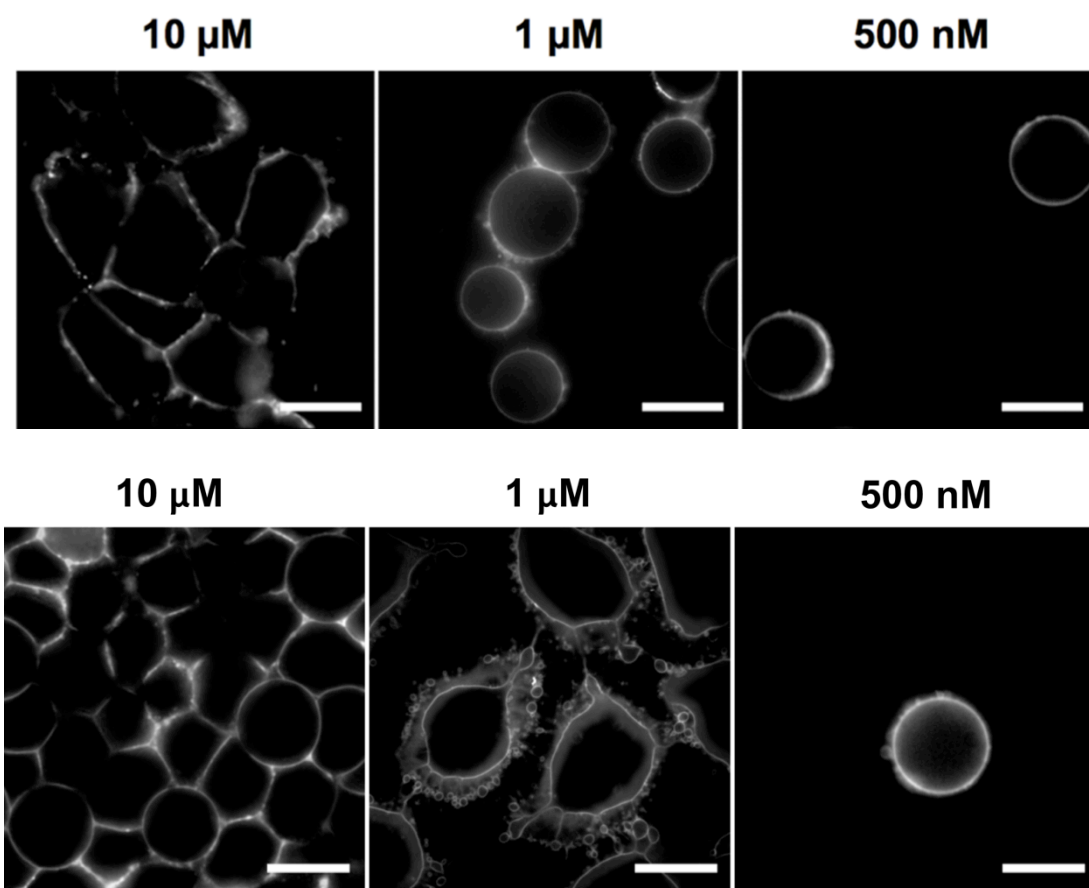

**Figure S4.** Deep-red fluorescence micrographs of dead and dying MDA-MB-231 cells (*top row*), or A549 cells (*bottom row*). In each case, the cells were treated with etoposide (15 μM) for 11 hr, incubated with the indicated concentration of Tetra-Zn<sub>2</sub>BDPA-SR for 30 min at 37 °C, then washed with HEPES buffer. Scale bar = 30 μm.

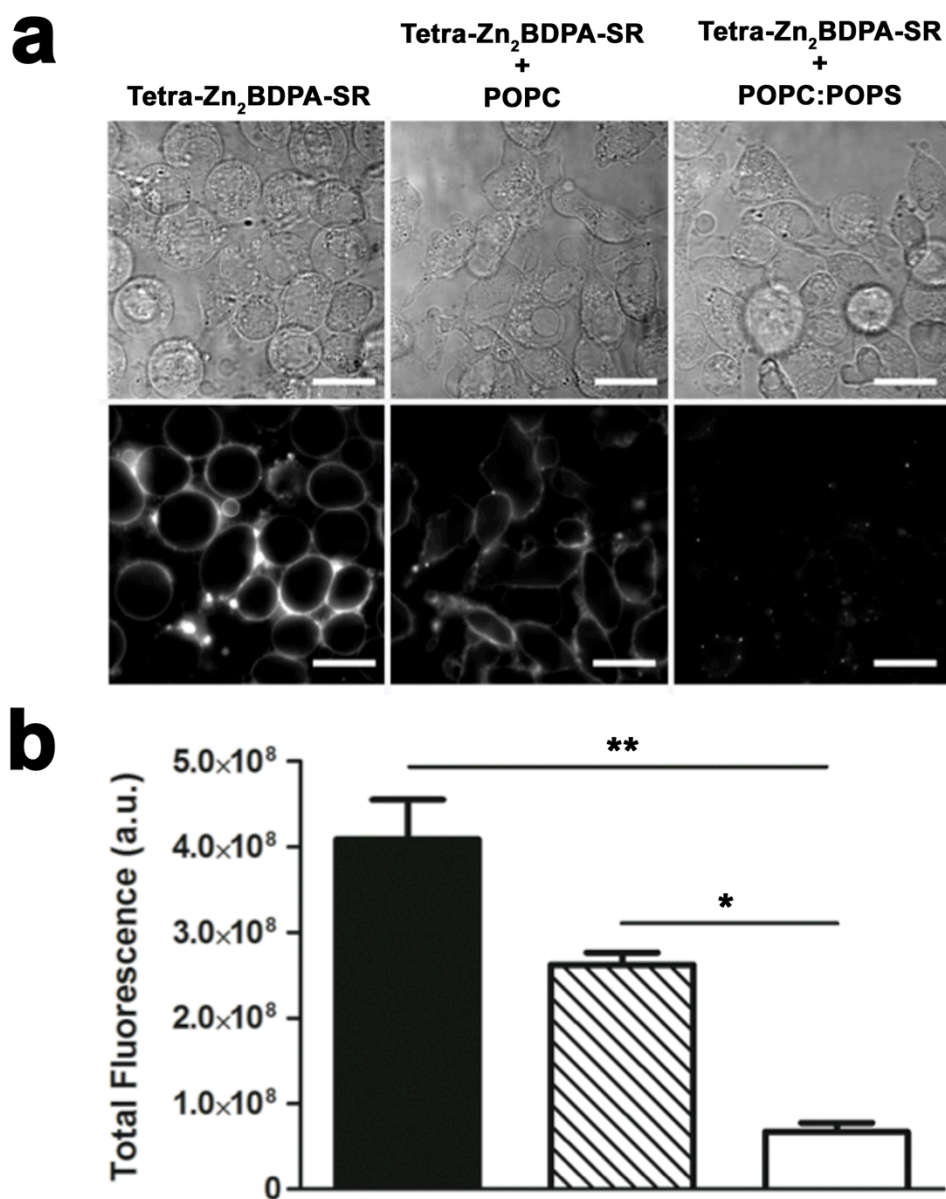

**Figure S5.** Cold block of Tetra-Zn<sub>2</sub>BDPA-SR binding to dead/dying MDA-MB-231 cells using POPC and POPC:POPS (50:50) vesicles. Fluorescence microscopy of etoposide-treated MDA-MB-231 cells stained with either Tetra-Zn<sub>2</sub>BDPA-SR alone (1 μM), Tetra-Zn<sub>2</sub>BDPA-SR with POPC vesicles, or Tetra-Zn<sub>2</sub>BDPA-SR with POPC:POPS (1:1) vesicles (**a**). The vesicle phospholipid concentration was 100-fold more than the concentration of Tetra-Zn<sub>2</sub>BDPA-SR. Scale bar = 30 μm. Quantitative comparison of total fluorescence intensity for Tetra-Zn<sub>2</sub>BDPA-SR (black bar), Bis-Zn<sub>2</sub>BDPA-SR (dashed bar), and Tracer-653 (white bar) (**b**). The total fluorescence was measured from 6 random fields of view. \* P < 0.0002, \*\* P < 0.002.

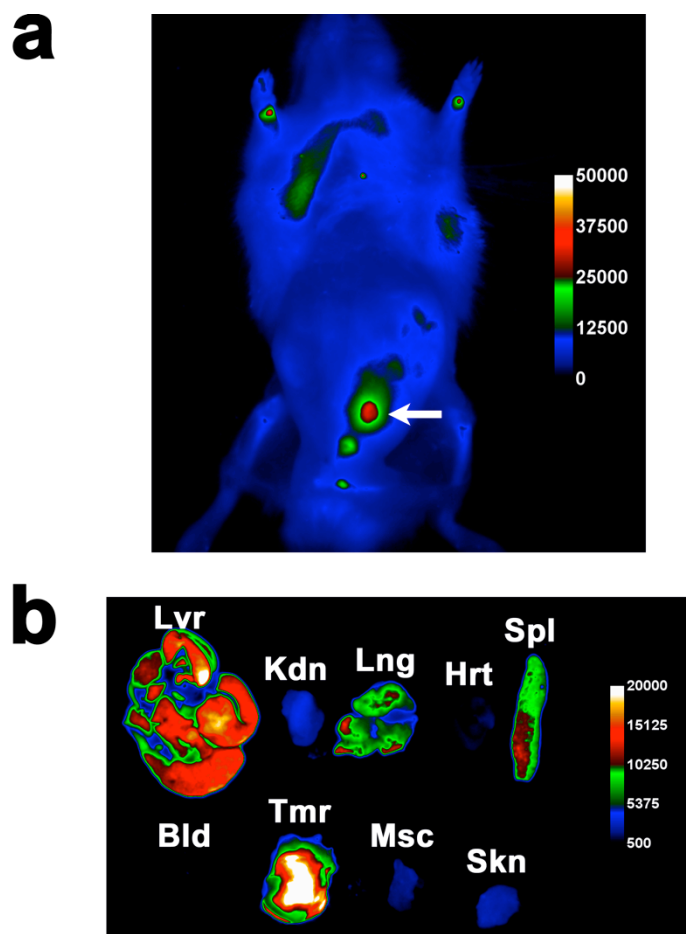

**Figure S6.** Representative fluorescence image of Tetra- $Zn_2$ BDPA-SR localization to a spontaneous prostate tumor in a Lobund-Wistar rat. Image was acquired after sacrificed at 24 h post-probe injection and the skin from the lower half of the animal was removed to facilitate semi-quantitative imaging. The arrow denotes the location of the tumor (**a**). Representative ex vivo fluorescence image of Tetra- $Zn_2$ BDPA-SR accumulation in excised rat tissues (**b**). N = 3.

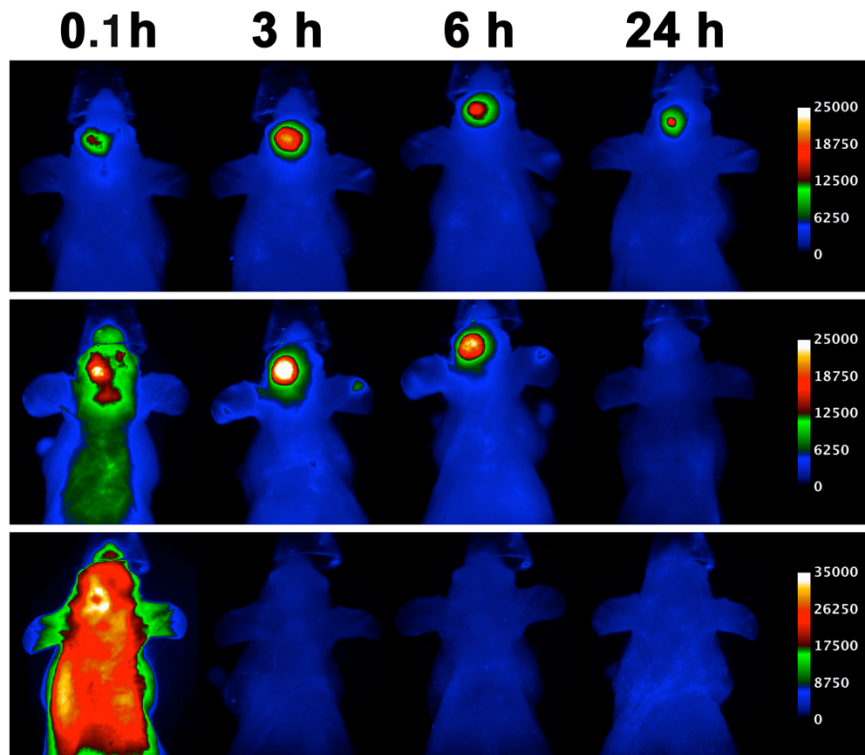

**Figure S7.** Representative in vivo fluorescence montages of Tetra-Zn<sub>2</sub>BDPA-SR (top row), Bis-Zn<sub>2</sub>BDPA-SR (middle row), and Tracer-653 (bottom row) accumulation in a traumatic brain injury mouse model. Whole-body images of living mice were acquired at the indicated time points after probe injection. N = 4.

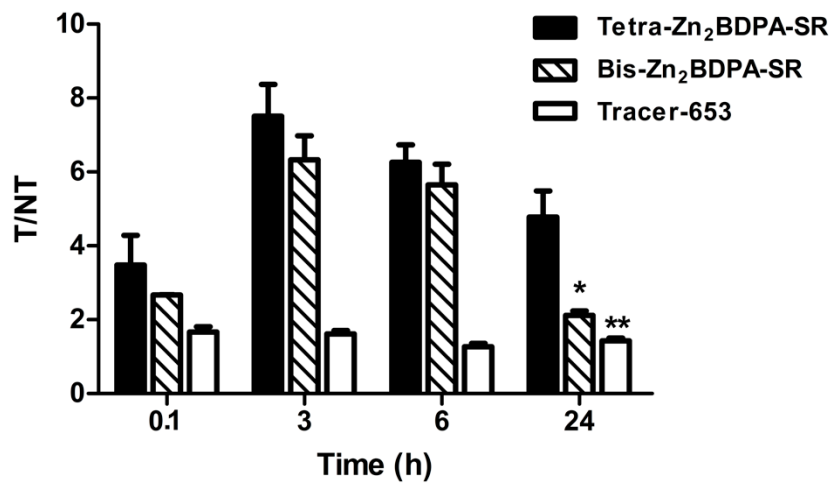



**Figure S8.** T/NT ratios for the in vivo fluorescence images in Figure S7. Region of interest analysis used the cryoinjury target site as T and lower back of the animal as NT. Errors bars represent the standard error of the mean. \* P < 0.03, \*\*P < 0.003. N = 5.

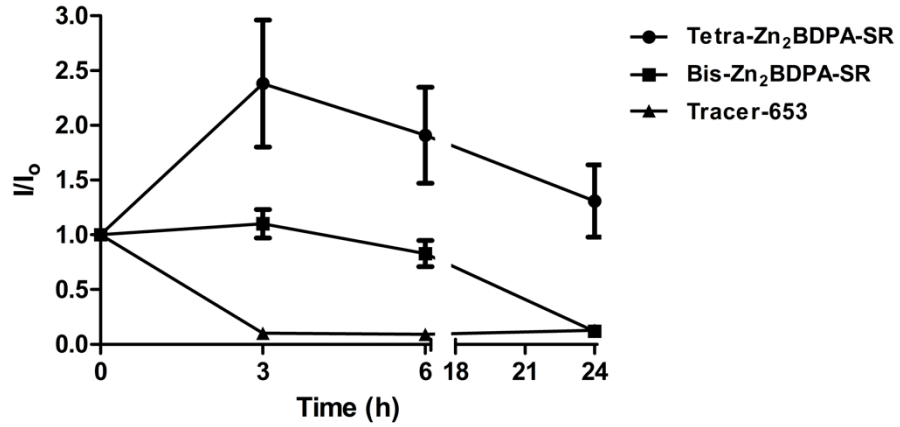

**Figure S9.** Normalized change in the mean pixel intensity at the site of cryoinjury for in vivo fluorescence images in Figure S7. Error bars represent the standard error of the mean. N = 5.

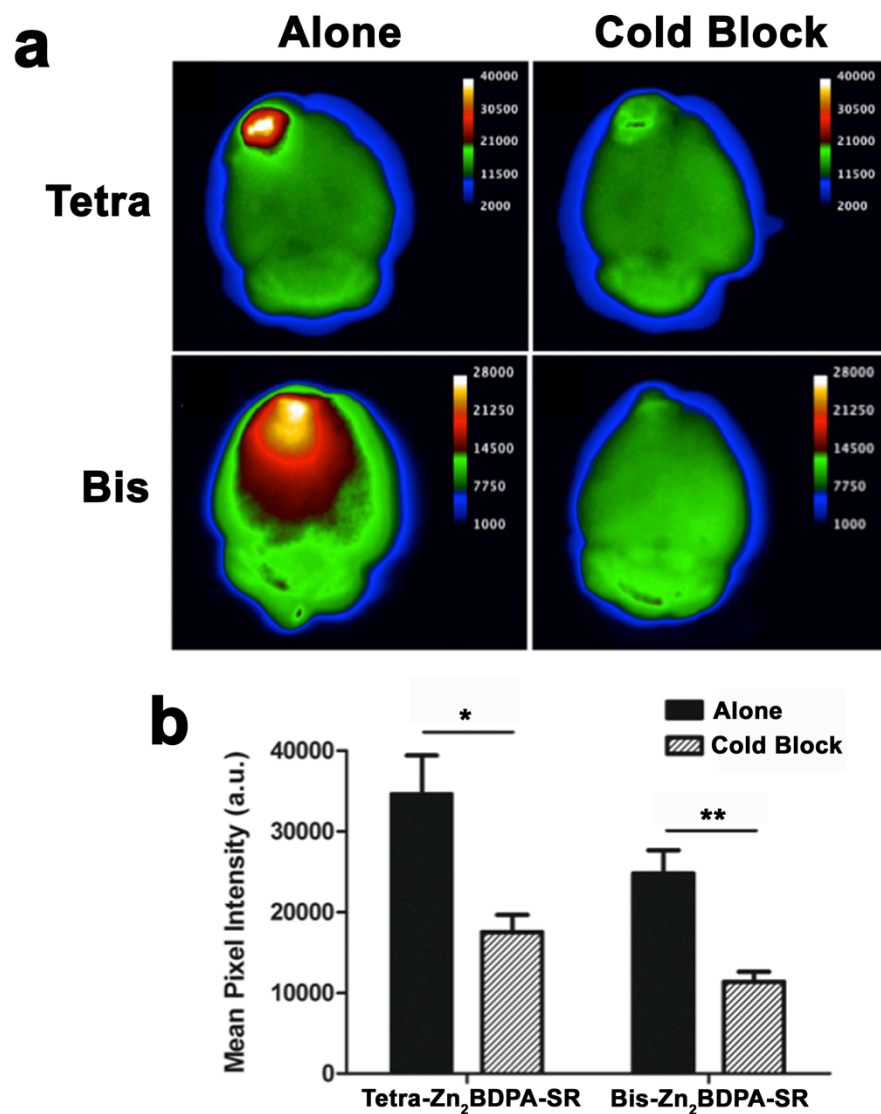

**Figure S10.** Cold block of Tetra-Zn<sub>2</sub>BDPA-SR and Bis-Zn<sub>2</sub>BDPA-SR accumulation in cryoinjured mouse brains. Representative ex vivo fluorescence images of cryoinjured brains taken from mice dosed first with vehicle control (Alone) or 15-fold molar excess of non-fluorescent Zn<sub>2</sub>BDPA (Cold Block), then injected intravenously with Tetra-Zn<sub>2</sub>BDPA-SR or Bis-Zn<sub>2</sub>BDPA-SR fluorescent probe and finally sacrificed 24 h post-probe injection (**a**). Mean pixel intensities for the cryoinjury site within each ex vivo brain image, in the presence and absence of the cold block (**b**). \* P < 0.02, \*\* P < 0.005. N = 4.
